# Supplementary material
Source: MDPI journal article supplement (https://www.mdpi.com/2079-9276/12/9/110)
Supplement: s1 [file s1]

## Article

# A Century of Changes in the Surface Area of Lakes in West Poland

Mariusz Ptak, Katarzyna Szyga-Pluta, Salim Heddami, Senlin Zhu and Mariusz Sojka

## Supplementary Materials

**Table S1.** Change in the area of the analyzed lakes (1900–2000).

| No | Lake           | Change Area [%] | Area [ha]<br>Beginning<br>of the 20th Century | Depth Max [m] | m a.s.l. |
|----|----------------|-----------------|-----------------------------------------------|---------------|----------|
| 1  | Biezdruchowo   | −21.6           | 49                                            | 16.6          | 96       |
| 2  | Białkoskie     | −13.4           | 153                                           | 29            | 83.1     |
| 3  | Białcz Wielki  | −26.3           | 38                                            | 5.5           | 39.7     |
| 4  | Biskupińskie   | −19.8           | 128                                           | 14            | 79.6     |
| 5  | Bnińskie       | −11.0           | 254                                           | 8.3           | 65.5     |
| 6  | Bobowickie     | −19.7           | 36                                            | 14.5          | 51.5     |
| 7  | Bochenek       | −26.7           | 4.5                                           | 6             | 70.8     |
| 8  | Breńskie       | −40.1           | 201                                           | 10.5          | 61.1     |
| 9  | Włókna–Brzeźno | −25.0           | 107                                           | 7.9           | 74.2     |
| 10 | Brzostek       | −18.3           | 6                                             | 7.8           | 92       |
| 11 | Budzyńskie     | −43.2           | 19                                            | 3.2           | 61.4     |
| 12 | Bukowieckie    | −25.7           | 56                                            | 9             | 79       |
| 13 | Budziszewskie  | −10.7           | 177                                           | 14.5          | 71.5     |
| 14 | Buszewskie     | −6.3            | 81                                            | 10            | 94.1     |
| 15 | Bytyńskie      | −7.5            | 330                                           | 8             | 85.4     |
| 16 | Chalinek       | −20.6           | 17                                            | 6.7           | 36.7     |
| 17 | Chłop          | −2.9            | 225                                           | 23.2          | 53.7     |
| 18 | Chrzypskie     | −11.6           | 323                                           | 14            | 40.9     |
| 19 | Dymaczewskie   | −11.7           | 137                                           | 12            | 64.7     |
| 20 | Dębiniec       | −41.2           | 17                                            | 7.7           | 89.2     |
| 21 | Dębno          | −24.4           | 25                                            | 10.6          | 70.9     |
| 22 | Dominickie     | −12.0           | 382                                           | 17.2          | 61.7     |
| 23 | Dormowskie     | −13.7           | 30                                            | 12.4          | 71.3     |
| 24 | Durowskie      | −13.6           | 161                                           | 15            | 78.1     |
| 25 | Jezioro Wielki | −8.2            | 72                                            | 5.2           | 66.4     |
| 26 | Dobre Duże     | −2.5            | 12                                            | 14.6          | 101.7    |
| 27 | Małe           | −38.3           | 6                                             | 5.2           | 101      |
| 28 | Głębocek       | −1.3            | 8                                             | 13.3          | 39.4     |
| 29 | Głębokie       | −6.9            | 120                                           | 19            | 50       |
| 30 | Głuchowskie    | −17.1           | 17                                            | 6             | 59       |
| 31 | Godawskie      | −12.9           | 31                                            | 7.5           | 79.8     |
| 32 | Gąsawskie      | −14.0           | 108                                           | 10.5          | 79.9     |
| 33 | Gopło          | −3.4            | 2200                                          | 15.7          | 77.1     |
| 34 | Wielkie        | −15.4           | 39                                            | 10.4          | 39.8     |
| 35 | Gorzyńskie     | −4.0            | 81                                            | 34            | 44.6     |

|    |                  |       |     |      |       |
|----|------------------|-------|-----|------|-------|
| 36 | Zamkowe Przednie | −2.2  | 4.6 | 6.5  | 50    |
| 37 | Zamkowe Środkowe | −17.4 | 4.6 | 14.3 | 50    |
| 38 | Zamkowe Tylne    | 0.0   | 3.2 | 13   | 50    |
| 39 | Wielkowiejskie   | −60.0 | 35  | 3.5  | 70.9  |
| 40 | Rybojadło        | −19.2 | 377 | 3.9  | 51.2  |
| 41 | Grylewskie       | −9.9  | 110 | 6.7  | 79.3  |
| 42 | Górskie          | −33.0 | 44  | 4    | 76.4  |
| 43 | Góreckie         | −12.7 | 106 | 17   | 66.3  |
| 44 | Skockie          | −6.3  | 79  | 5.6  | 72.7  |
| 45 | Paklicko Małe    | −16.5 | 54  | 10.5 | 79    |
| 46 | Chycina          | −9.8  | 84  | 15.5 | 40.6  |
| 47 | Lgińsko Duże     | −15.8 | 79  | 17.6 | 62.2  |
| 48 | Lgińsko Małe     | −22.8 | 50  | 7.3  | 62.3  |
| 49 | Janukowo         | −6.1  | 33  | 22.4 | 36    |
| 50 | Jarosławieckie   | 0.0   | 10  | 5.4  | 76.3  |
| 51 | Jaroszewskie     | −7.2  | 96  | 34.8 | 39    |
| 52 | Jerzyńskie       | −17.2 | 46  | 12.7 | 94.5  |
| 53 | Jezimówek        | 10.0  | 2   | 4    | 74    |
| 54 | Kamienickie      | −17.0 | 284 | 18   | 85.6  |
| 55 | Skrzynka         | −10.3 | 29  | 19   | 79.7  |
| 56 | Kociołek         | −25.0 | 4.8 | 7.7  | 65.5  |
| 57 | Kierskie         | −8.1  | 310 | 35   | 71.9  |
| 58 | Kierskie Małe    | −20.3 | 34  | 2.3  | 71.7  |
| 59 | Chalińskie Małe  | −5.0  | 20  | 25.8 | 39.4  |
| 60 | Trzemeszno       | −28.8 | 8   | 5.5  | 101.2 |
| 61 | Kobyleckie       | −7.4  | 68  | 14.5 | 78.7  |
| 62 | Chodzieskie      | −9.5  | 126 | 7.2  | 54.2  |
| 63 | Krwawe           | −3.3  | 3   | 7.8  | 46.7  |
| 64 | Kórnickie        | −12.2 | 87  | 6.6  | 65.3  |
| 65 | Kursko           | 0.0   | 75  | 8.3  | 41.3  |
| 66 | Kwileckie        | 16.0  | 20  | 7.5  | 80.4  |
| 67 | Długie           | −45.5 | 6.6 | 2    | 53.1  |
| 68 | Długie           | −10.2 | 98  | 12.5 | 41.3  |
| 69 | Ławickie         | −12.0 | 95  | 18   | 36.6  |
| 70 | Łękno            | −2.2  | 27  | 5.2  | 67.1  |
| 71 | Łękniewskie      | −33.9 | 88  | 2.6  | 84.8  |
| 72 | Lednica          | −11.5 | 364 | 14.2 | 109.8 |
| 73 | Łęgowskie        | −57.8 | 103 | 5.3  | 77.4  |
| 74 | Lubikowskie      | −14.7 | 340 | 34   | 54.6  |
| 75 | Lipno            | −15.6 | 9   | 9.4  | 70    |
| 76 | Logo             | 5.2   | 60  | 4.5  | 77.5  |
| 77 | Łowyńskie        | −7.4  | 27  | 11.4 | 76.3  |
| 78 | Lubosińskie      | −18.0 | 89  | 6    | 93.9  |
| 79 | Lusowskie        | −17.0 | 148 | 18.2 | 79.6  |
| 80 | Lutomskie        | −7.6  | 174 | 9.3  | 37.6  |
| 81 | Maciejak         | −28.8 | 128 | 6.7  | 74.1  |
| 82 | Malicz           | −55.8 | 26  | 8.7  | 98.9  |
| 83 | Moczydło         | −21.7 | 6   | 3    | 38.3  |
| 84 | Mogileńskie      | −7.0  | 86  | 7.3  | 89.9  |
| 85 | Mielno           | −16.6 | 203 | 7.2  | 75.3  |
| 86 | Mormin           | −30.0 | 14  | 3.5  | 68    |

|     |                  |        |      |      |      |
|-----|------------------|--------|------|------|------|
| 87  | Niepruszewskie   | −1.2   | 248  | 4.5  | 77.8 |
| 88  | Oćwieckie        | −12.6  | 151  | 45   | 81.9 |
| 89  | Okienko          | −40.0  | 1    | 5.6  | 54.5 |
| 90  | Ostrowickie      | −2.1   | 281  | 25.7 | 99.6 |
| 91  | Ostrowskie       | −19.4  | 349  | 32.5 | 99   |
| 93  | Proboszczowskie  | −11.8  | 17   | 6.8  | 51.3 |
| 94  | Pieceniewo       | −17.2  | 18   | 14.3 | 54.5 |
| 95  | Putnik           | −11.9  | 21   | 9.6  | 39   |
| 96  | Podgaje          | −100.0 | 27   | 0.9  | 68.8 |
| 97  | Popielewskie     | −4.5   | 313  | 50.5 | 96   |
| 98  | Powidzkie        | −7.1   | 1200 | 40.3 | 98.7 |
| 99  | Przemęckie       | −9.6   | 758  | 5.7  | 60.9 |
| 100 | Starskie         | −13.2  | 71   | 13.5 | 77   |
| 101 | Przydrożne       | −20.8  | 13   | 24.1 | 54.5 |
| 102 | Raczyńskie       | 9.1    | 79   | 6    | 68   |
| 103 | Stęszewskie      | −14.5  | 106  | 13.5 | 94.7 |
| 104 | Rgielskie        | −30.6  | 281  | 15   | 84.6 |
| 105 | Rogoźno          | −7.2   | 136  | 6.5  | 69.5 |
| 106 | Chomęcickie      | −32.1  | 43   | 10   | 81.3 |
| 107 | Rosnówko Małe    | −33.0  | 10   | 4.8  | 78.8 |
| 108 | Sadłogoszcz      | −33.3  | 57   | 2.9  | 75.2 |
| 109 | Samotęskie       | 7.0    | 27   | 24.3 | 59   |
| 110 | Szamotulskie     | −7.5   | 4    | 3.5  | 64   |
| 111 | Wielkie          | −23.2  | 37   | 1.8  | 67.3 |
| 112 | Małe             | −45.0  | 6    | 1.2  | 67   |
| 113 | Szydłowskie      | −5.6   | 142  | 24.8 | 95.2 |
| 114 | Śremskie         | −6.6   | 122  | 49   | 39.3 |
| 115 | Strzelecki       | −10.0  | 18   | 4.7  | 64.3 |
| 116 | Czarne           | 0.0    | 24   | 15.4 | 72   |
| 117 | Czarne           | −15.4  | 2.6  | 8.8  | 54   |
| 118 | Karolewskie      | −7.7   | 13   | 8.7  | 76.2 |
| 119 | Czarne           | −27.5  | 24   | 8    | 54.7 |
| 120 | Swarzędzkie      | −10.0  | 90   | 7.5  | 70.9 |
| 121 | Jezioro Małe     | −5.7   | 53   | 14   | 67.1 |
| 122 | Strzeszyńskie    | 9.1    | 32   | 16.5 | 76.6 |
| 123 | Skarbińskie      | −13.2  | 75   | 10   | 79.4 |
| 124 | Niedzięgiel      | −16.4  | 748  | 23   | 104  |
| 125 | Skrzynka         | −46.7  | 3    | 3.1  | 67   |
| 126 | Skrzyneckie Duże | −4.0   | 77   | 6.1  | 65.2 |
| 127 | Skrzyneckie Małe | −19.0  | 20   | 5.6  | 65.1 |
| 128 | Pszczewskie      | −7.5   | 67   | 18.6 | 57   |
| 129 | Stołuń           | −17.4  | 23   | 17   | 55.3 |
| 130 | Straduńskie      | −1.5   | 92   | 5.5  | 75.4 |
| 131 | Strykowskie      | −21.9  | 372  | 7.5  | 73   |
| 132 | Głębokie         | −7.3   | 11   | 14.5 | 72   |
| 133 | Głęboki          | −13.3  | 30   | 17   | 51.3 |
| 134 | Tomickie         | −39.7  | 68   | 19   | 69   |
| 135 | Cisie            | −5.0   | 42   | 19   | 40.3 |
| 136 | Wenecja          | −17.0  | 151  | 17.5 | 79.6 |
| 137 | Borówiec         | −100.0 | 17   | 0.8  | 64.6 |
| 138 | Karczewnik       | −5.1   | 35   | 6    | 60.8 |

---

|     |                  |       |     |      |       |
|-----|------------------|-------|-----|------|-------|
| 139 | Białe            | −13.6 | 50  | 10.7 | 103.8 |
| 140 | Białe            | −20.2 | 56  | 11   | 55.1  |
| 141 | Wiatrowskie      | −8.7  | 31  | 12   | 77.8  |
| 142 | Widzno           | −11.7 | 6   | 9.6  | 41.4  |
| 143 | Wiecanowskie     | −19.0 | 345 | 8    | 91.3  |
| 144 | Wyszanowo        | −16.7 | 33  | 5.7  | 59    |
| 145 | Witobelskie      | −4.5  | 106 | 5.5  | 64.8  |
| 146 | Wójtostwo        | 14.3  | 7   | 6.2  | 92.2  |
| 147 | Wroczyńskie Duże | −8.3  | 41  | 4.7  | 94.6  |
| 148 | Wroczyńskie Małe | −8.2  | 22  | 7.6  | 94.6  |
| 149 | Sarcz            | −9.3  | 54  | 7.5  | 77.4  |
| 150 | Zajączowskie     | −6.1  | 46  | 34   | 72.6  |
| 151 | Żnińskie Duże    | −4.5  | 458 | 12.1 | 78.7  |
| 152 | Żnińskie Małe    | −22.5 | 165 | 5.8  | 78.9  |
| 153 | Barlin           | −6.5  | 108 | 4    | 34.9  |
| 154 | Zbąszyńskie      | −11.4 | 760 | 9    | 52.8  |
| 155 | Berzyńskie       | −18.1 | 374 | 5    | 58.6  |
| 156 | Żydówko          | −49.4 | 17  | 2    | 107.2 |
| 157 | Kaliszańskie     | −14.0 | 321 | 27   | 87.5  |
| 158 | Małe             | −1.4  | 14  | 4    | 77.2  |
| 159 | Kłosowskie       | −9.2  | 142 | 5    | 35.6  |
| 160 | Krzywce Wielkie  | −6.0  | 82  | 7.5  | 104   |
| 161 | Mierzyńskie      | −6.7  | 48  | 5    | 33.6  |
| 162 | Owieczki         | −7.3  | 15  | 7    | 106.4 |
| 163 | Piaskowe         | −4.3  | 14  | 4    | 34.9  |
| 164 | Stępuchowskie    | −0.9  | 108 | 6    | 95    |
| 165 | Łoniewskie       | −35.6 | 140 | 5.2  | 71.9  |
| 166 | Wędromierz       | −4.2  | 73  | 13   | 52.4  |
| 167 | Witosławskie     | −13.4 | 59  | 45   | 69.5  |
| 168 | Wolsztyńskie     | −17.0 | 146 | 4.5  | 59.8  |
| 169 | Wojnowickie      | −10.6 | 66  | 5    | 69    |

---
